# Supplementary material for: Socioeconomic differences in body mass index in Spain: An intersectional multilevel analysis of individual heterogeneity and discriminatory accuracy
Source: PubMed Central journal article supplement (PMC6287827; doi:10.1371/journal.pone.0208624), 2018-12-10
Supplement: pone.0208624.s001.pdf [file pone.0208624.s001.pdf]

| Ranking model 1 | Ranking model 2 | Gender |         | Age |       |     | Income |        |      | Education |        |      | Living alone |     | n (%)      | Estimated residues (95% CI)<br><br>Model 1 Simple intersectional | Estimated residues (95% CI)<br><br>Model 2 Intersectional interaction |
|-----------------|-----------------|--------|---------|-----|-------|-----|--------|--------|------|-----------|--------|------|--------------|-----|------------|------------------------------------------------------------------|-----------------------------------------------------------------------|
|                 |                 | Males  | Females | ≤35 | 36-64 | ≥65 | Low    | Medium | High | Low       | Medium | High | No           | Yes |            |                                                                  |                                                                       |
| 1               | 8               |        |         |     |       |     |        |        |      |           |        |      |              |     | 110 (0.78) | -3.7 (-4.5 - -2.9)*                                              | -0.6 (-1.4 - 0.1)                                                     |
| 2               | 32              |        |         |     |       |     |        |        |      |           |        |      |              |     | 57 (0.4)   | -3.6 (-4.7 - -2.6)*                                              | -0.2 (-1 - 0.6)                                                       |
| 3               | 31              |        |         |     |       |     |        |        |      |           |        |      |              |     | 232 (1.63) | -3.3 (-4 - -2.7)*                                                | -0.2 (-0.8 - 0.4)                                                     |
| 4               | 11              |        |         |     |       |     |        |        |      |           |        |      |              |     | 39 (0.27)  | -3 (-4.3 - -1.7)*                                                | -0.4 (-1.3 - 0.5)                                                     |
| 5               | 19              |        |         |     |       |     |        |        |      |           |        |      |              |     | 78 (0.55)  | -2.7 (-3.7 - -1.8)*                                              | -0.3 (-1.1 - 0.5)                                                     |
| 6               | 30              |        |         |     |       |     |        |        |      |           |        |      |              |     | 22 (0.16)  | -2.7 (-4.2 - -1.2)*                                              | -0.2 (-1.1 - 0.8)                                                     |
| 7               | 20              |        |         |     |       |     |        |        |      |           |        |      |              |     | 215 (1.52) | -2.6 (-3.2 - -1.9)*                                              | -0.3 (-1 - 0.3)                                                       |
| 8               | 1               |        |         |     |       |     |        |        |      |           |        |      |              |     | 546 (3.85) | -2.4 (-2.9 - -1.9)*                                              | -1.2 (-1.8 - -0.7)*                                                   |
| 9               | 10              |        |         |     |       |     |        |        |      |           |        |      |              |     | 233 (1.64) | -2.4 (-3.1 - -1.8)*                                              | -0.4 (-1 - 0.2)                                                       |
| 10              | 5               |        |         |     |       |     |        |        |      |           |        |      |              |     | 225 (1.59) | -1.9 (-2.5 - -1.2)*                                              | -0.8 (-1.5 - -0.2)*                                                   |
| 11              | 18              |        |         |     |       |     |        |        |      |           |        |      |              |     | 439 (3.09) | -1.8 (-2.3 - -1.3)*                                              | -0.3 (-0.8 - 0.3)                                                     |
| 12              | 23              |        |         |     |       |     |        |        |      |           |        |      |              |     | 12 (0.08)  | -1.8 (-3.7 - 0.1)                                                | -0.3 (-1.3 - 0.8)                                                     |
| 13              | 35              |        |         |     |       |     |        |        |      |           |        |      |              |     | 123 (0.87) | -1.8 (-2.6 - -1)*                                                | -0.2 (-0.9 - 0.5)                                                     |
| 14              | 59              |        |         |     |       |     |        |        |      |           |        |      |              |     | 56 (0.39)  | -1.8 (-2.9 - -0.7)*                                              | 0 (-0.9 - 0.8)                                                        |
| 15              | 72              |        |         |     |       |     |        |        |      |           |        |      |              |     | 37 (0.26)  | -1.8 (-3 - -0.5)*                                                | 0.2 (-0.7 - 1.1)                                                      |
| 16              | 12              |        |         |     |       |     |        |        |      |           |        |      |              |     | 49 (0.35)  | -1.7 (-2.8 - -0.5)*                                              | -0.3 (-1.1 - 0.6)                                                     |
| 17              | 68              |        |         |     |       |     |        |        |      |           |        |      |              |     | 8 (0.06)   | -1.7 (-3.8 - 0.5)                                                | 0.1 (-1 - 1.2)                                                        |
| 18              | 24              |        |         |     |       |     |        |        |      |           |        |      |              |     | 36 (0.25)  | -1.5 (-2.8 - -0.2)*                                              | -0.3 (-1.2 - 0.6)                                                     |
| 19              | 21              |        |         |     |       |     |        |        |      |           |        |      |              |     | 17 (0.12)  | -1.4 (-3.1 - 0.3)                                                | -0.3 (-1.3 - 0.7)                                                     |
| 20              | 3               |        |         |     |       |     |        |        |      |           |        |      |              |     | 485 (3.42) | -1.3 (-1.8 - -0.8)*                                              | -1 (-1.6 - -0.5)*                                                     |
| 21              | 6               |        |         |     |       |     |        |        |      |           |        |      |              |     | 40 (0.28)  | -1 (-2.2 - 0.2)                                                  | -0.7 (-1.6 - 0.2)                                                     |
| 22              | 104             |        |         |     |       |     |        |        |      |           |        |      |              |     | 229 (1.61) | -1 (-1.6 - -0.3)*                                                | 0.8 (0.2 - 1.5)*                                                      |
| 23              | 39              |        |         |     |       |     |        |        |      |           |        |      |              |     | 3 (0.02)   | -0.9 (-3.6 - 1.7)                                                | -0.1 (-1.2 - 1)                                                       |
| 24              | 40              |        |         |     |       |     |        |        |      |           |        |      |              |     | 4 (0.03)   | -0.9 (-3.4 - 1.6)                                                | -0.1 (-1.2 - 1)                                                       |
| 25              | 92              |        |         |     |       |     |        |        |      |           |        |      |              |     | 109 (0.77) | -0.9 (-1.7 - 0)                                                  | 0.5 (-0.3 - 1.2)                                                      |
| 26              | 94              |        |         |     |       |     |        |        |      |           |        |      |              |     | 27 (0.19)  | -0.9 (-2.3 - 0.5)                                                | 0.5 (-0.4 - 1.5)                                                      |
| 27              | 26              |        |         |     |       |     |        |        |      |           |        |      |              |     | 9 (0.06)   | -0.8 (-2.8 - 1.3)                                                | -0.2 (-1.2 - 0.9)                                                     |
| 28              | 34              |        |         |     |       |     |        |        |      |           |        |      |              |     | 115 (0.81) | -0.8 (-1.6 - -0.1)*                                              | -0.2 (-0.9 - 0.5)                                                     |
| 29              | 50              |        |         |     |       |     |        |        |      |           |        |      |              |     | 51 (0.36)  | -0.8 (-1.9 - 0.3)                                                | 0 (-0.9 - 0.8)                                                        |
| 30              | 103             |        |         |     |       |     |        |        |      |           |        |      |              |     | 100 (0.7)  | -0.7 (-1.6 - 0.2)                                                | 0.7 (0 - 1.5)                                                         |
| 31              | 25              |        |         |     |       |     |        |        |      |           |        |      |              |     | 379 (2.67) | -0.6 (-1.1 - 0)                                                  | -0.2 (-0.7 - 0.4)                                                     |
| 32              | 41              |        |         |     |       |     |        |        |      |           |        |      |              |     | 4 (0.03)   | -0.6 (-3.1 - 1.9)                                                | -0.1 (-1.2 - 1.1)                                                     |
| 33              | 42              |        |         |     |       |     |        |        |      |           |        |      |              |     | 7 (0.05)   | -0.6 (-2.8 - 1.6)                                                | -0.1 (-1.2 - 1)                                                       |
| 34              | 43              |        |         |     |       |     |        |        |      |           |        |      |              |     | 98 (0.69)  | -0.6 (-1.4 - 0.3)                                                | -0.1 (-0.9 - 0.6)                                                     |
| 35              | 61              |        |         |     |       |     |        |        |      |           |        |      |              |     | 2 (0.01)   | -0.6 (-3.4 - 2.1)                                                | 0 (-1.2 - 1.1)                                                        |
| 36              | 87              |        |         |     |       |     |        |        |      |           |        |      |              |     | 202 (1.42) | -0.6 (-1.2 - 0.1)                                                | 0.4 (-0.3 - 1)                                                        |
| 37              | 38              |        |         |     |       |     |        |        |      |           |        |      |              |     | 4 (0.03)   | -0.5 (-3 - 2)                                                    | -0.1 (-1.2 - 1)                                                       |
| 38              | 45              |        |         |     |       |     |        |        |      |           |        |      |              |     | 5 (0.04)   | -0.5 (-2.9 - 1.9)                                                | -0.1 (-1.2 - 1)                                                       |
| 39              | 49              |        |         |     |       |     |        |        |      |           |        |      |              |     | 6 (0.04)   | -0.5 (-2.8 - 1.9)                                                | -0.1 (-1.2 - 1)                                                       |

| Ranking model 1 | Ranking model 2 | Gender |         | Age |       |     | Income |        |      | Education |        |      | Living alone |     | n (%)      | Estimated residues (95% CI)<br><br>Model 1 Simple intersectional | Estimated residues (95% CI)<br><br>Model 2 Intersectional interaction |
|-----------------|-----------------|--------|---------|-----|-------|-----|--------|--------|------|-----------|--------|------|--------------|-----|------------|------------------------------------------------------------------|-----------------------------------------------------------------------|
|                 |                 | Males  | Females | ≤35 | 36-64 | ≥65 | Low    | Medium | High | Low       | Medium | High | No           | Yes |            |                                                                  |                                                                       |
| 40              | 60              |        |         |     |       |     |        |        |      |           |        |      |              |     | 7 (0.05)   | -0.5 (-2.7 - 1.8)                                                | 0 (-1 - 1.1)                                                          |
| 41              | 62              |        |         |     |       |     |        |        |      |           |        |      |              |     | 106 (0.75) | -0.5 (-1.3 - 0.4)                                                | 0 (-0.8 - 0.7)                                                        |
| 42              | 86              |        |         |     |       |     |        |        |      |           |        |      |              |     | 51 (0.36)  | -0.4 (-1.6 - 0.7)                                                | 0.4 (-0.4 - 1.3)                                                      |
| 43              | 22              |        |         |     |       |     |        |        |      |           |        |      |              |     | 600 (4.23) | -0.3 (-0.7 - 0.2)                                                | -0.3 (-0.8 - 0.2)                                                     |
| 44              | 48              |        |         |     |       |     |        |        |      |           |        |      |              |     | 12 (0.08)  | -0.3 (-2.2 - 1.5)                                                | -0.1 (-1.2 - 0.9)                                                     |
| 45              | 91              |        |         |     |       |     |        |        |      |           |        |      |              |     | 247 (1.74) | -0.3 (-0.9 - 0.3)                                                | 0.5 (-0.1 - 1.1)                                                      |
| 46              | 58              |        |         |     |       |     |        |        |      |           |        |      |              |     | 2 (0.01)   | -0.2 (-3 - 2.5)                                                  | 0 (-1.1 - 1.2)                                                        |
| 47              | 65              |        |         |     |       |     |        |        |      |           |        |      |              |     | 3 (0.02)   | -0.1 (-2.7 - 2.5)                                                | 0.1 (-1 - 1.2)                                                        |
| 48              | 71              |        |         |     |       |     |        |        |      |           |        |      |              |     | 10 (0.07)  | -0.1 (-2.1 - 2)                                                  | 0.1 (-0.9 - 1.2)                                                      |
| 49              | 85              |        |         |     |       |     |        |        |      |           |        |      |              |     | 133 (0.94) | 0 (-0.8 - 0.7)                                                   | 0.3 (-0.4 - 0.9)                                                      |
| 50              | 90              |        |         |     |       |     |        |        |      |           |        |      |              |     | 83 (0.58)  | 0 (-0.9 - 1)                                                     | 0.4 (-0.4 - 1.2)                                                      |
| 51              | 36              |        |         |     |       |     |        |        |      |           |        |      |              |     | 37 (0.26)  | 0.1 (-1.3 - 1.4)                                                 | -0.2 (-1.1 - 0.7)                                                     |
| 52              | 37              |        |         |     |       |     |        |        |      |           |        |      |              |     | 105 (0.74) | 0.1 (-0.7 - 0.9)                                                 | -0.2 (-0.9 - 0.6)                                                     |
| 53              | 52              |        |         |     |       |     |        |        |      |           |        |      |              |     | 15 (0.11)  | 0.1 (-1.6 - 1.9)                                                 | 0 (-1 - 1)                                                            |
| 54              | 57              |        |         |     |       |     |        |        |      |           |        |      |              |     | 30 (0.21)  | 0.1 (-1.3 - 1.5)                                                 | 0 (-0.9 - 1)                                                          |
| 55              | 66              |        |         |     |       |     |        |        |      |           |        |      |              |     | 4 (0.03)   | 0.1 (-2.4 - 2.7)                                                 | 0.1 (-1.1 - 1.2)                                                      |
| 56              | 70              |        |         |     |       |     |        |        |      |           |        |      |              |     | 89 (0.63)  | 0.2 (-0.7 - 1.1)                                                 | 0.1 (-0.7 - 0.9)                                                      |
| 57              | 81              |        |         |     |       |     |        |        |      |           |        |      |              |     | 61 (0.43)  | 0.2 (-0.8 - 1.2)                                                 | 0.2 (-0.6 - 1)                                                        |
| 58              | 84              |        |         |     |       |     |        |        |      |           |        |      |              |     | 26 (0.18)  | 0.2 (-1.2 - 1.7)                                                 | 0.3 (-0.6 - 1.3)                                                      |
| 59              | 27              |        |         |     |       |     |        |        |      |           |        |      |              |     | 97 (0.68)  | 0.4 (-0.5 - 1.2)                                                 | -0.2 (-1 - 0.5)                                                       |
| 60              | 33              |        |         |     |       |     |        |        |      |           |        |      |              |     | 59 (0.42)  | 0.4 (-0.7 - 1.5)                                                 | -0.2 (-1 - 0.6)                                                       |
| 61              | 47              |        |         |     |       |     |        |        |      |           |        |      |              |     | 845 (5.95) | 0.4 (0 - 0.9)                                                    | -0.1 (-0.6 - 0.4)                                                     |
| 62              | 54              |        |         |     |       |     |        |        |      |           |        |      |              |     | 7 (0.05)   | 0.5 (-1.7 - 2.8)                                                 | 0 (-1.1 - 1.2)                                                        |
| 63              | 55              |        |         |     |       |     |        |        |      |           |        |      |              |     | 32 (0.23)  | 0.5 (-0.8 - 1.9)                                                 | 0 (-1 - 0.9)                                                          |
| 64              | 28              |        |         |     |       |     |        |        |      |           |        |      |              |     | 25 (0.18)  | 0.6 (-0.9 - 2.1)                                                 | -0.2 (-1.1 - 0.8)                                                     |
| 65              | 63              |        |         |     |       |     |        |        |      |           |        |      |              |     | 27 (0.19)  | 0.6 (-0.9 - 2)                                                   | 0 (-0.9 - 1)                                                          |
| 66              | 69              |        |         |     |       |     |        |        |      |           |        |      |              |     | 170 (1.2)  | 0.6 (-0.1 - 1.3)                                                 | 0.1 (-0.6 - 0.7)                                                      |
| 67              | 96              |        |         |     |       |     |        |        |      |           |        |      |              |     | 45 (0.32)  | 0.6 (-0.6 - 1.8)                                                 | 0.5 (-0.4 - 1.4)                                                      |
| 68              | 13              |        |         |     |       |     |        |        |      |           |        |      |              |     | 130 (0.92) | 0.7 (0 - 1.5)                                                    | -0.3 (-1 - 0.4)                                                       |
| 69              | 44              |        |         |     |       |     |        |        |      |           |        |      |              |     | 21 (0.15)  | 0.7 (-0.9 - 2.3)                                                 | -0.1 (-1.1 - 0.9)                                                     |
| 70              | 97              |        |         |     |       |     |        |        |      |           |        |      |              |     | 598 (4.21) | 0.7 (0.3 - 1.2)*                                                 | 0.6 (0.1 - 1.1)*                                                      |
| 71              | 15              |        |         |     |       |     |        |        |      |           |        |      |              |     | 39 (0.27)  | 0.8 (-0.4 - 2)                                                   | -0.3 (-1.2 - 0.5)                                                     |
| 72              | 64              |        |         |     |       |     |        |        |      |           |        |      |              |     | 27 (0.19)  | 0.8 (-0.6 - 2.3)                                                 | 0 (-1 - 0.9)                                                          |
| 73              | 77              |        |         |     |       |     |        |        |      |           |        |      |              |     | 242 (1.71) | 0.8 (0.2 - 1.4)*                                                 | 0.2 (-0.4 - 0.9)                                                      |
| 74              | 89              |        |         |     |       |     |        |        |      |           |        |      |              |     | 176 (1.24) | 0.8 (0.1 - 1.5)*                                                 | 0.4 (-0.2 - 1.1)                                                      |
| 75              | 99              |        |         |     |       |     |        |        |      |           |        |      |              |     | 126 (0.89) | 0.8 (0 - 1.6)                                                    | 0.6 (-0.1 - 1.3)                                                      |
| 76              | 78              |        |         |     |       |     |        |        |      |           |        |      |              |     | 15 (0.11)  | 0.9 (-0.9 - 2.7)                                                 | 0.2 (-0.8 - 1.2)                                                      |
| 77              | 17              |        |         |     |       |     |        |        |      |           |        |      |              |     | 50 (0.35)  | 1 (-0.2 - 2.1)                                                   | -0.3 (-1.2 - 0.5)                                                     |
| 78              | 53              |        |         |     |       |     |        |        |      |           |        |      |              |     | 527 (3.71) | 1 (0.5 - 1.5)*                                                   | 0 (-0.5 - 0.5)                                                        |

| Ranking model 1 | Ranking model 2 | Gender |         | Age |       |     | Income |        |      | Education |        |      | Living alone |     | n (%)      | Estimated residues (95% CI)<br><br>Model 1 Simple intersectional | Estimated residues (95% CI)<br><br>Model 2 Intersectional interaction |
|-----------------|-----------------|--------|---------|-----|-------|-----|--------|--------|------|-----------|--------|------|--------------|-----|------------|------------------------------------------------------------------|-----------------------------------------------------------------------|
|                 |                 | Males  | Females | ≤35 | 36-64 | ≥65 | Low    | Medium | High | Low       | Medium | High | No           | Yes |            |                                                                  |                                                                       |
| 79              | 80              |        |         |     |       |     |        |        |      |           |        |      |              |     | 110 (0.78) | 1 (0.2 - 1.8)*                                                   | 0.2 (-0.5 - 0.9)                                                      |
| 80              | 83              |        |         |     |       |     |        |        |      |           |        |      |              |     | 86 (0.61)  | 1 (0.1 - 1.9)*                                                   | 0.3 (-0.4 - 1.1)                                                      |
| 81              | 67              |        |         |     |       |     |        |        |      |           |        |      |              |     | 54 (0.38)  | 1.1 (0 - 2.2)                                                    | 0.1 (-0.7 - 0.9)                                                      |
| 82              | 4               |        |         |     |       |     |        |        |      |           |        |      |              |     | 152 (1.07) | 1.2 (0.5 - 2)*                                                   | -0.9 (-1.6 - -0.2)*                                                   |
| 83              | 102             |        |         |     |       |     |        |        |      |           |        |      |              |     | 203 (1.43) | 1.2 (0.6 - 1.9)*                                                 | 0.6 (-0.1 - 1.2)                                                      |
| 84              | 16              |        |         |     |       |     |        |        |      |           |        |      |              |     | 182 (1.28) | 1.3 (0.6 - 2)*                                                   | -0.3 (-0.9 - 0.4)                                                     |
| 85              | 46              |        |         |     |       |     |        |        |      |           |        |      |              |     | 130 (0.92) | 1.3 (0.5 - 2)*                                                   | -0.1 (-0.8 - 0.6)                                                     |
| 86              | 88              |        |         |     |       |     |        |        |      |           |        |      |              |     | 122 (0.86) | 1.3 (0.5 - 2.1)*                                                 | 0.4 (-0.3 - 1.1)                                                      |
| 87              | 101             |        |         |     |       |     |        |        |      |           |        |      |              |     | 36 (0.25)  | 1.3 (0 - 2.6)                                                    | 0.6 (-0.3 - 1.5)                                                      |
| 88              | 29              |        |         |     |       |     |        |        |      |           |        |      |              |     | 50 (0.35)  | 1.4 (0.3 - 2.5)*                                                 | -0.2 (-1 - 0.7)                                                       |
| 89              | 75              |        |         |     |       |     |        |        |      |           |        |      |              |     | 645 (4.55) | 1.4 (0.9 - 1.8)*                                                 | 0.2 (-0.4 - 0.7)                                                      |
| 90              | 7               |        |         |     |       |     |        |        |      |           |        |      |              |     | 162 (1.14) | 1.5 (0.8 - 2.2)*                                                 | -0.7 (-1.3 - 0)                                                       |
| 91              | 76              |        |         |     |       |     |        |        |      |           |        |      |              |     | 28 (0.2)   | 1.5 (0.1 - 2.9)*                                                 | 0.2 (-0.7 - 1.2)                                                      |
| 92              | 79              |        |         |     |       |     |        |        |      |           |        |      |              |     | 137 (0.97) | 1.5 (0.8 - 2.3)*                                                 | 0.2 (-0.5 - 0.9)                                                      |
| 93              | 98              |        |         |     |       |     |        |        |      |           |        |      |              |     | 73 (0.51)  | 1.7 (0.8 - 2.7)*                                                 | 0.6 (-0.2 - 1.4)                                                      |
| 94              | 2               |        |         |     |       |     |        |        |      |           |        |      |              |     | 264 (1.86) | 1.8 (1.2 - 2.4)*                                                 | -1 (-1.6 - -0.4)*                                                     |
| 95              | 9               |        |         |     |       |     |        |        |      |           |        |      |              |     | 114 (0.8)  | 1.8 (0.9 - 2.6)*                                                 | -0.4 (-1.1 - 0.3)                                                     |
| 96              | 14              |        |         |     |       |     |        |        |      |           |        |      |              |     | 218 (1.54) | 1.8 (1.1 - 2.4)*                                                 | -0.3 (-1 - 0.3)                                                       |
| 97              | 51              |        |         |     |       |     |        |        |      |           |        |      |              |     | 769 (5.42) | 1.8 (1.3 - 2.2)*                                                 | 0 (-0.5 - 0.5)                                                        |
| 98              | 95              |        |         |     |       |     |        |        |      |           |        |      |              |     | 512 (3.61) | 1.8 (1.3 - 2.3)*                                                 | 0.5 (0 - 1)                                                           |
| 99              | 56              |        |         |     |       |     |        |        |      |           |        |      |              |     | 42 (0.3)   | 2 (0.8 - 3.2)*                                                   | 0 (-0.9 - 0.9)                                                        |
| 100             | 73              |        |         |     |       |     |        |        |      |           |        |      |              |     | 67 (0.47)  | 2 (1 - 3)*                                                       | 0.2 (-0.7 - 1)                                                        |
| 101             | 105             |        |         |     |       |     |        |        |      |           |        |      |              |     | 261 (1.84) | 2.1 (1.5 - 2.7)*                                                 | 0.9 (0.3 - 1.5)*                                                      |
| 102             | 74              |        |         |     |       |     |        |        |      |           |        |      |              |     | 67 (0.47)  | 2.2 (1.2 - 3.2)*                                                 | 0.2 (-0.6 - 1.1)                                                      |
| 103             | 82              |        |         |     |       |     |        |        |      |           |        |      |              |     | 25 (0.18)  | 2.2 (0.7 - 3.7)*                                                 | 0.3 (-0.6 - 1.3)                                                      |
| 104             | 93              |        |         |     |       |     |        |        |      |           |        |      |              |     | 20 (0.14)  | 2.5 (0.9 - 4.1)*                                                 | 0.5 (-0.5 - 1.5)                                                      |
| 105             | 100             |        |         |     |       |     |        |        |      |           |        |      |              |     | 249 (1.75) | 2.5 (1.9 - 3.1)*                                                 | 0.6 (0 - 1.2)                                                         |
| 106             | 106             |        |         |     |       |     |        |        |      |           |        |      |              |     | 120 (0.85) | <b>2.6 (1.8 - 3.4)*</b>                                          | <b>1 (0.3 - 1.7)*</b>                                                 |
| 107             | 107             |        |         |     |       |     |        |        |      |           |        |      |              |     | -          | -                                                                | -                                                                     |
| 108             | 108             |        |         |     |       |     |        |        |      |           |        |      |              |     | -          | -                                                                | -                                                                     |
